# Supplementary material for: Age and CD161 Expression Contribute to Inter-Individual Variation in Interleukin-23 Response in CD8+ Memory Human T Cells
Source: PubMed Central journal article supplement (PMC3585933; doi:10.1371/journal.pone.0057746), 2013-03-01
Supplement: pone.0057746.s004.pdf [file pone.0057746.s004.pdf]

Table S1. Overlap between CD8+CD45RO+ memory T cells, CD3+CD56+ NKT cells, and CD3+CD161+ cells in peripheral blood

|                          | <b>Mean</b> | <b>SD</b> | <b>Range</b>    |
|--------------------------|-------------|-----------|-----------------|
| # of healthy donors      | 15          |           |                 |
| Age (years)              | 31.4        | 12.21     | 19-60           |
| CD3+CD8+CD45RO+ memory T |             |           |                 |
| CD56+                    | 6.47 %      | 4.62 %    | 1.21 – 16.31 %  |
| CD161+                   | 33.70 %     | 18.06 %   | 11.52 – 55.86 % |
| CD56+CD161+              | 5.16 %      | 5.00 %    | 0.49 – 15.61 %  |
| CD3+CD56+ NKT cells      |             |           |                 |
| CD8+CD45RO+              | 34.38 %     | 16.41 %   | 13.52 – 71.35 % |
| CD161+                   | 51.30 %     | 23.82 %   | 16.37 – 85.85 % |
| CD8+CD45RO+CD161+        | 26.86 %     | 19.29 %   | 1.92 – 66.89 %  |
| CD3+CD161+               |             |           |                 |
| CD8+CD45RO+              | 23.59 %     | 9.82 %    | 9.19 – 43.55 %  |
| CD56+                    | 6.56 %      | 3.60 %    | 1.37 – 13.68 %  |
| CD8+CD45RO+CD56+         | 1.83%       | 1.53 %    | 0.13 – 4.58 %   |

Percentages are fractions of each subset within CD8+CD45RO+ memory T cells, CD3+CD56+ NKT cells, or CD3+CD161+ cells. SD, Standard Deviation.
